# Supplementary material
Source: Springer Nature journal article supplement (https://www.springermedizin.de/resource/supplementary/13019_2009_214_MOESM7_ESM.pdf/9638090)

# OXIDATIVE STRESS

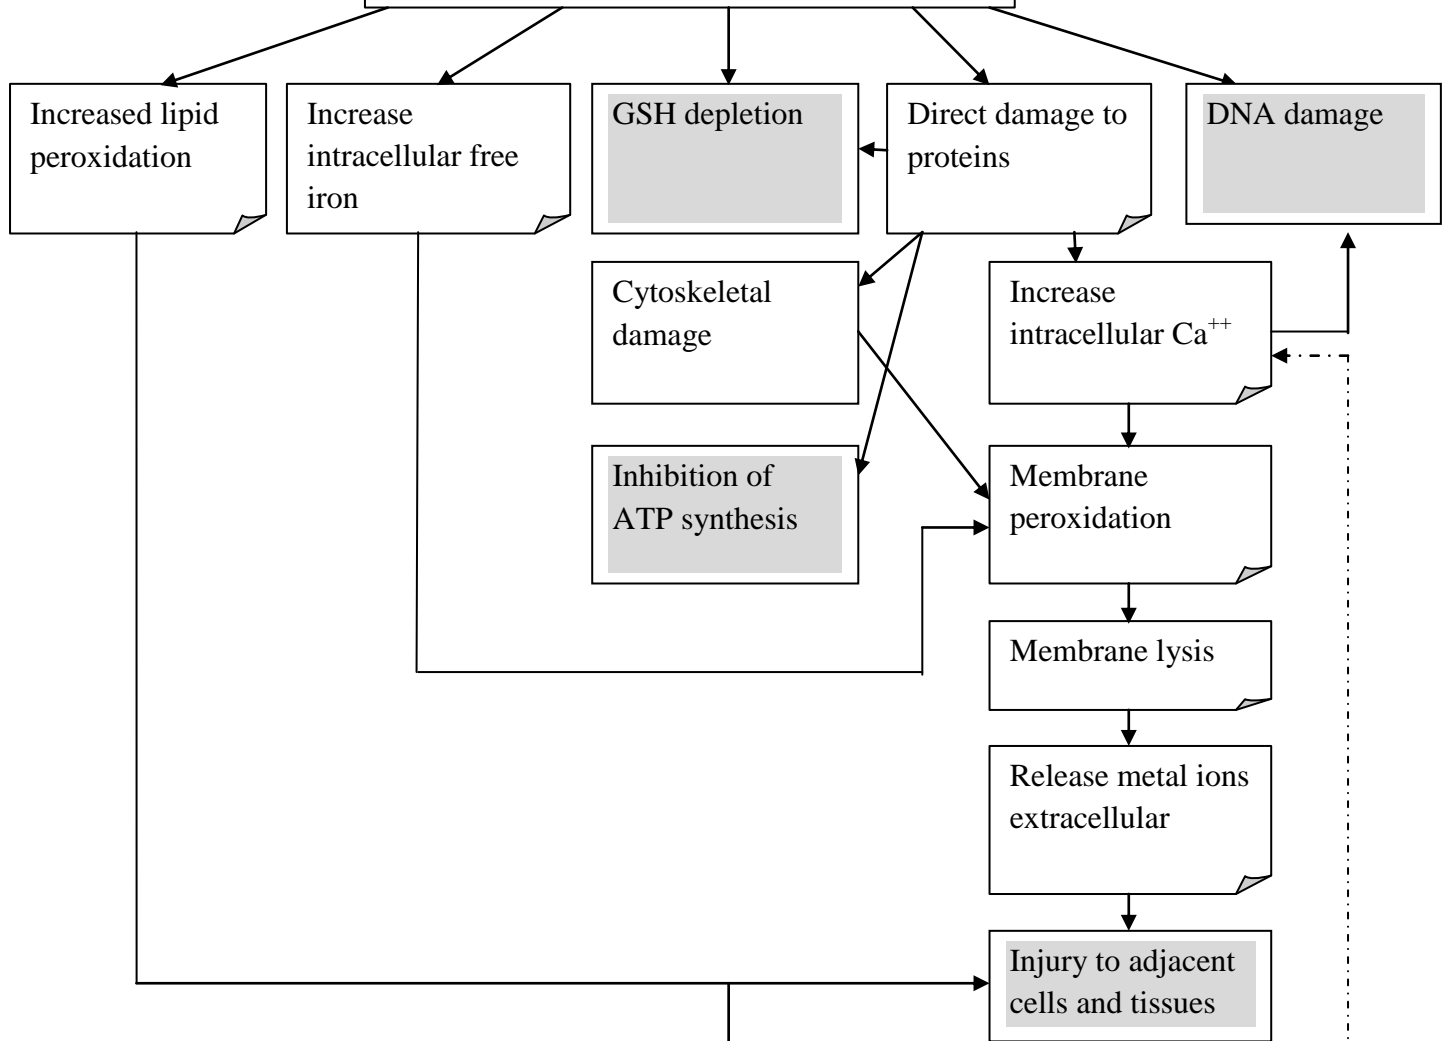

Increased damage to DNA PROTEINS LIPIDS

Cellular DNA repair

ROS SCAVENGER

↓ Hypercalcemia

Intracellular Intranuclear

Ethylol (WR-1065)

Active diffusion

Cell membrane alkaline phosphatase

**AMIFOSTINE**  
WR-2721

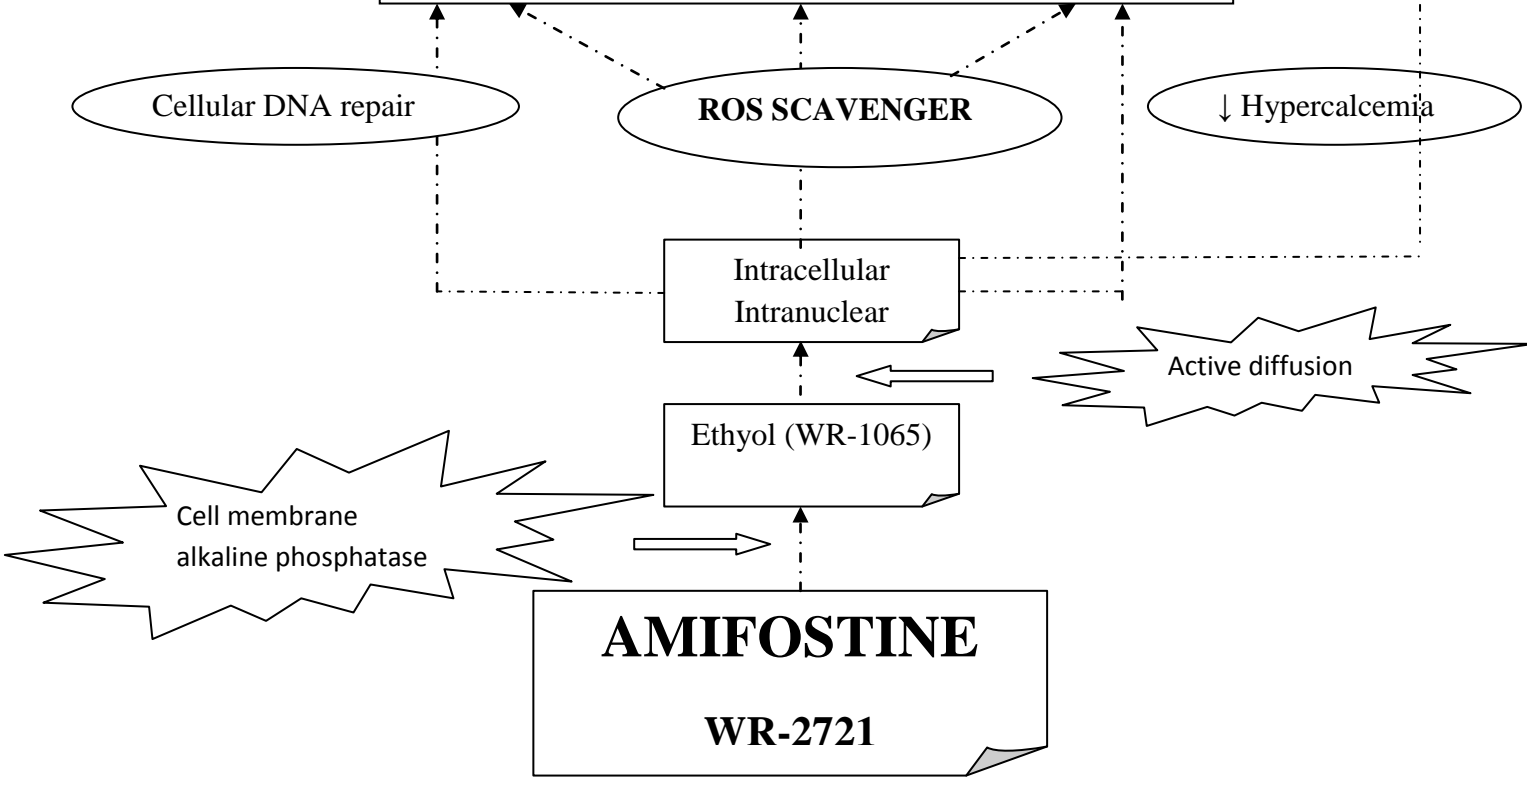

Supplement: MOESM7 [file 9638090]
